# Supplementary material for: Electropolymerized polyaniline/manganese iron oxide hybrids with an enhanced color switching response and electrochemical energy storage
Source: Royal Society of Chemistry journal article supplement (doi:10.1039/c5ta04439a), 2015-01-01
Supplement: c5ta04439a1.pdf [file c5ta04439a1.pdf]

Electronic Supplementary Information

**Electronic Supplementary Information (ESI)**

**Electropolymerized Polyaniline/Manganese Iron Oxide Hybrids with Enhanced  
Color Switching Response and Electrochemical Energy Storage**

Yiran Wang,<sup>1</sup> Huige Wei,<sup>2</sup> Jinmin Wang,<sup>3,\*</sup> Jiurong Liu,<sup>4,\*</sup> Jiang Guo,<sup>1</sup> Xin Zhang,<sup>5</sup>  
Brandon L. Weeks,<sup>5</sup> T. D. Shen,<sup>6</sup> Suying Wei,<sup>2</sup> and Zhanhu Guo<sup>1,\*</sup>

<sup>1</sup>Integrated Composites Laboratory (ICL), Department of Chemical & Biomolecular  
Engineering, University of Tennessee, Knoxville, TN 37996 USA

<sup>2</sup>Department of Chemistry and Biochemistry, Lamar University, Beaumont, TX  
77710, USA

<sup>3</sup>School of Urban Development and Environmental Engineering, Shanghai Second  
Polytechnic University, Shanghai 201209, P. R. China

<sup>4</sup>Key Laboratory for Liquid–Solid Structural Evolution and Processing of Materials,  
Ministry of Education and School of Materials Science and Engineering, Shandong  
University, Jinan, Shandong 250061, China

<sup>5</sup>Department of Chemical Engineering, Texas Tech University, Lubbock, TX 79409,  
USA

<sup>6</sup>State Key Laboratory of Metastable Materials Science and Technology, Yanshan  
University, Hebei 066004, China

Corresponding Authors:

\*E-mail:

[wangjinmin@sspu.edu.cn](mailto:wangjinmin@sspu.edu.cn) (J. W.); [jrliu@sdu.edu.cn](mailto:jrliu@sdu.edu.cn) (J. L.); [zguo10@utk.edu](mailto:zguo10@utk.edu) (Z. G.)

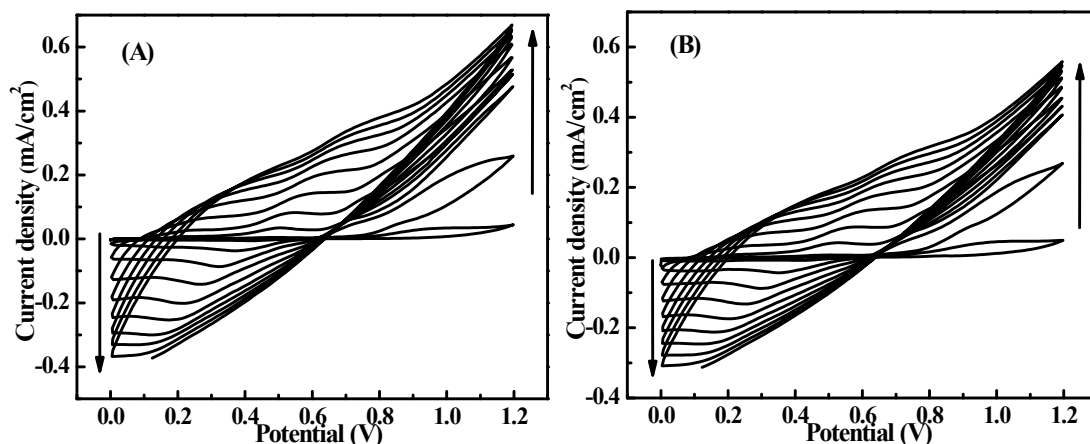

**Fig. S1** Electropolymerization synthesis of PANI onto (A) bare and (B)  $\text{MnFe}_2\text{O}_4$  coated ITO glasses at a scan rate of 50  $\text{mV/s}$  in 0.5 M  $\text{H}_2\text{SO}_4$  aqueous solution containing 0.1 M aniline.

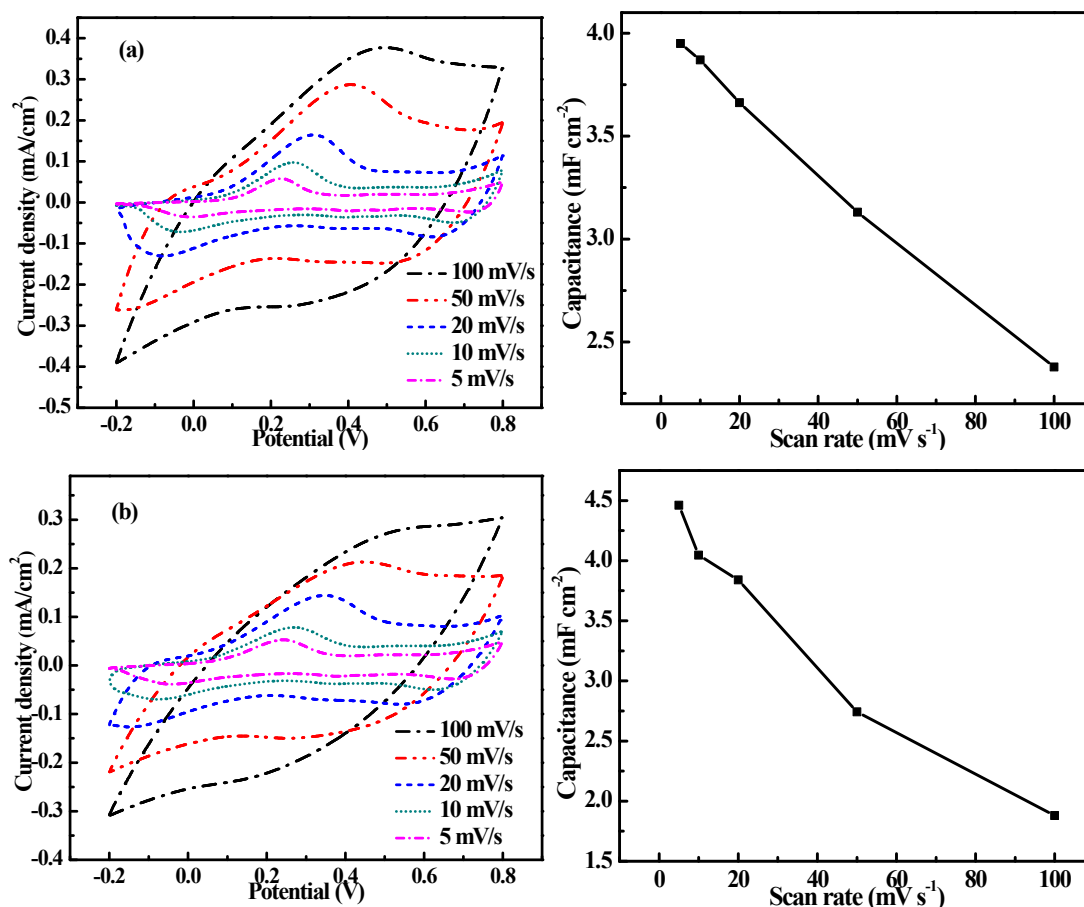

**Fig. S2** CV curves (left) and corresponding scan rate dependent areal capacitance (right) of (a) pristine PANI film and (b) PANI/ $\text{MnFe}_2\text{O}_4$  nanocomposites film at different scan rates under a potential range from -0.2 to 0.8 V in 1.0 M  $\text{H}_2\text{SO}_4$  aqueous solution.

Electronic Supplementary Information

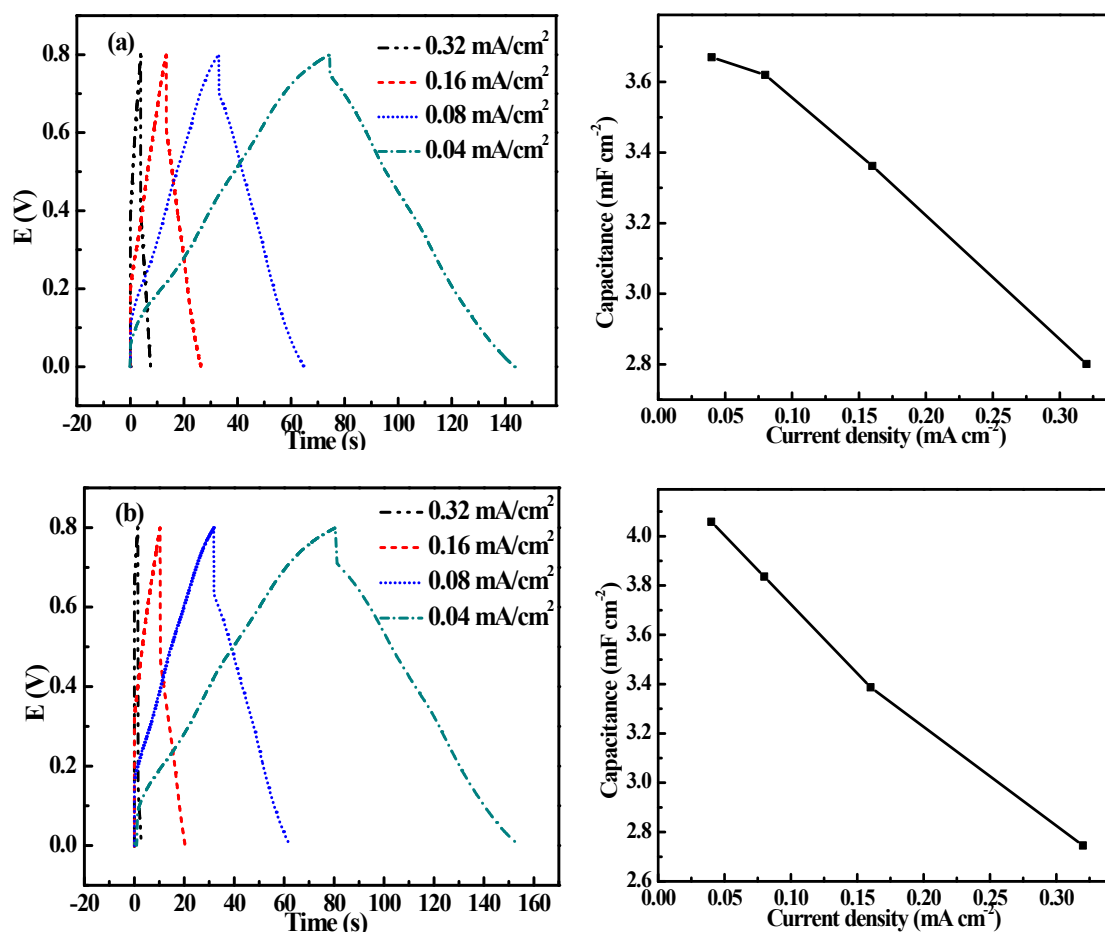

**Fig. S3** Galvanostatic charge-discharge curves (on the left) and corresponding current density dependent areal capacitance (on the right) of (a) pristine PANI film and (b) PANI/MnFe<sub>2</sub>O<sub>4</sub> nanocomposites film in 1.0 M H<sub>2</sub>SO<sub>4</sub> aqueous solution.

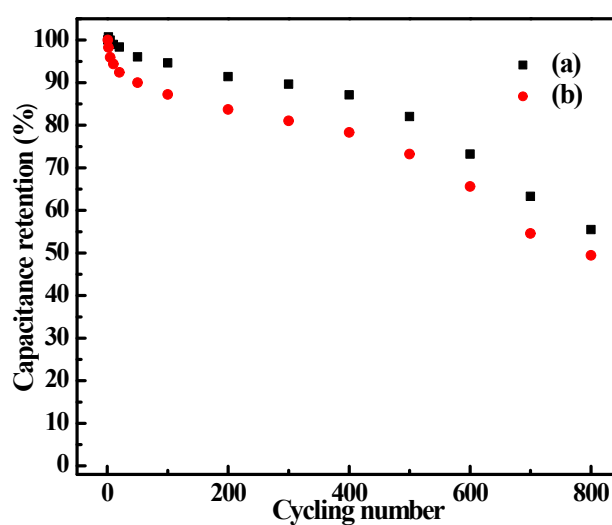

**Fig. S4** Cycling stability of (a) pristine PANI and (b) PANI/MnFe<sub>2</sub>O<sub>4</sub> nanocomposites electrodes at 0.08 mA/cm<sup>2</sup> for 800 cycles.

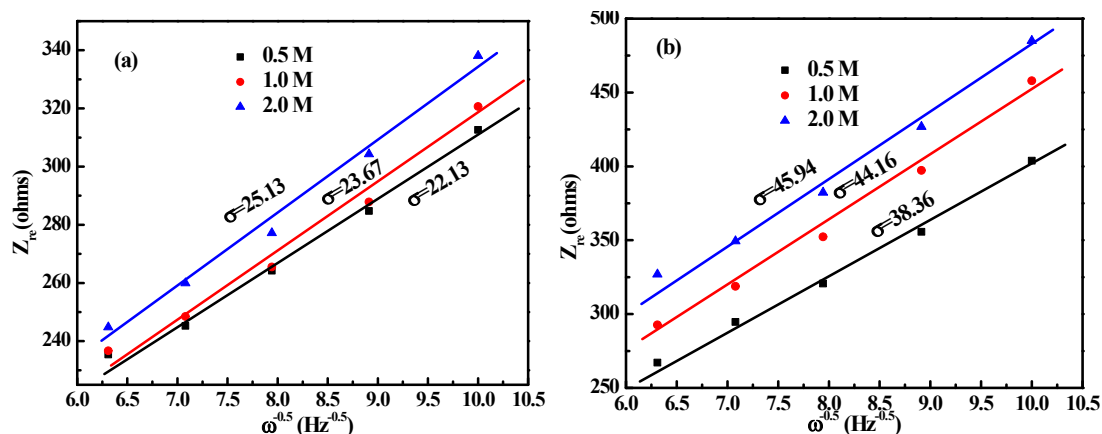

**Fig. S5** The Warburg factor  $\sigma$  of (a) pristine PANI and (b) PANI/Mn<sub>2</sub>FeO<sub>4</sub> nanocomposites films conducted in 0.5, 1.0 and 2.0 M H<sub>2</sub>SO<sub>4</sub> aqueous solution.

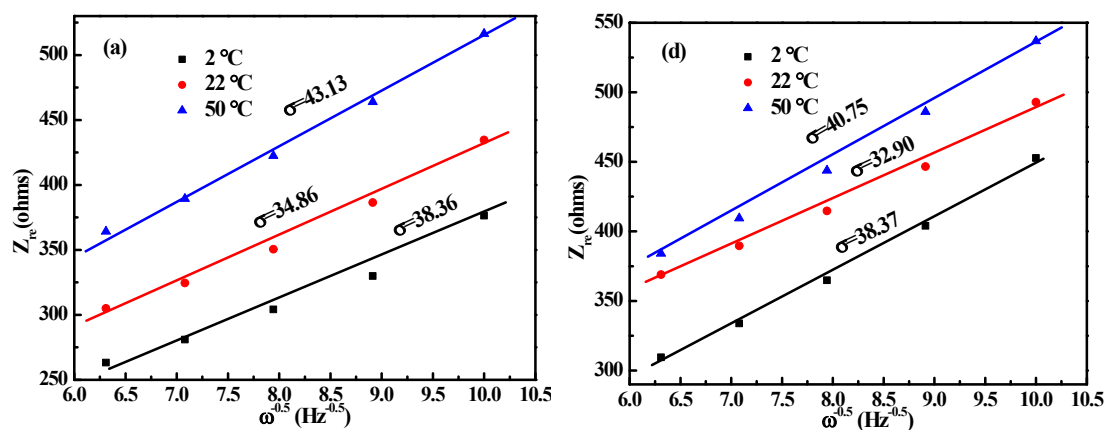

**Fig. S6** The Warburg factor  $\sigma$  of (a) pristine PANI and (b) PANI/Mn<sub>2</sub>FeO<sub>4</sub> nanocomposites films conducted in 2, 22 and 50 °C H<sub>2</sub>SO<sub>4</sub> aqueous solution.

The anion diffusion coefficient can be calculated from Equation S(1):

$$D = R^2 T^2 / (2 A^2 n^4 F^4 C^2 \sigma^2) \quad \text{S(1)}$$

where  $D$  is the diffusion coefficient of the HSO<sub>4</sub><sup>-</sup> anions,  $R$  is the gas constant (8.314),  $T$  is the absolute temperature,  $A$  is the surface area of the electrode (4 cm<sup>2</sup>),  $n$  is the number of electrons per molecule during the oxidization ( $n$  is 2),  $F$  is the Faraday constant (96485 sA/mol),  $C$  is the concentration of ions (mol/cm<sup>3</sup>),  $\sigma$  is the Warburg factor which can be obtained from the slopes in the low frequency region (<1 Hz) of EIS (Figure S5&6).

Electronic Supplementary Information

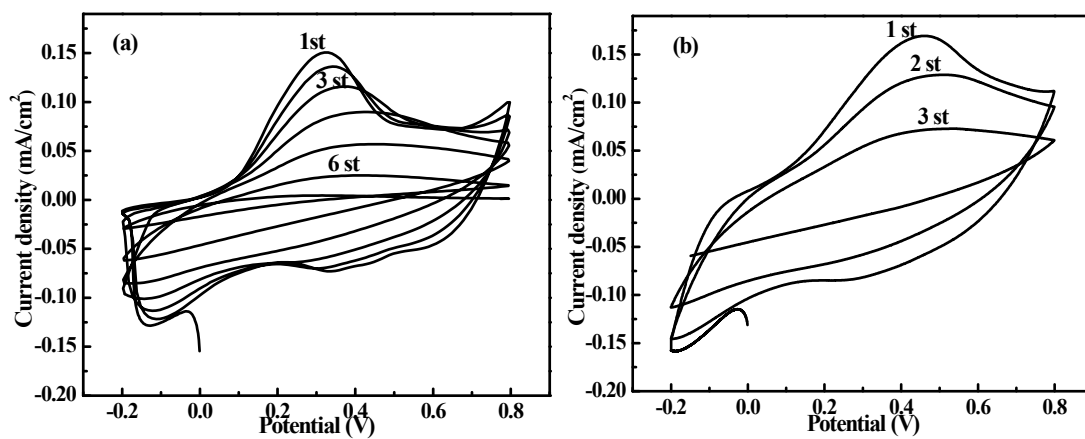

**Fig. S7** The first 6 and 3 CVs of the pristine PANI and PANI/MnFe<sub>2</sub>O<sub>4</sub> nanocomposites films at 50 °C.
